# Supplementary material for: Phosphomolybdic acid supported atomically dispersed transition metal atoms (M = Fe, Co, Ni, Cu, Ru, Rh, Pd, Ag, Os, Ir, Pt, and Au): stable single atom catalysts studied by density functional theory
Source: Royal Society of Chemistry journal article supplement (doi:10.1039/c7ra03490c), 2017-01-01
Supplement: c7ra03490c1.pdf [file c7ra03490c1.pdf]

## Supporting Information

**Phosphomolybdic Acid Supported Atomically Dispersed Transition  
Metal Atoms (M = Fe, Co, Ni, Cu, Ru, Rh, Pd, Ag, Os, Ir, Pt, and Au):  
Stable Single Atom Catalysts Studied by Density Functional Theory**

Shujiao Wang,<sup>a</sup> Yingxin Feng,<sup>a</sup> Sen Lin,<sup>\*, a</sup> and Hua Guo<sup>b</sup>

*<sup>a</sup>State Key Laboratory of Photocatalysis on Energy and Environment, College of  
Chemistry, Fuzhou University, Fuzhou 350002, People's Republic of China.*

*<sup>b</sup>Department of Chemistry and Chemical Biology, University of New Mexico,  
Albuquerque, NM 87131, USA.*

E-mail: [slin@fzu.edu.cn](mailto:slin@fzu.edu.cn) (S. Lin)

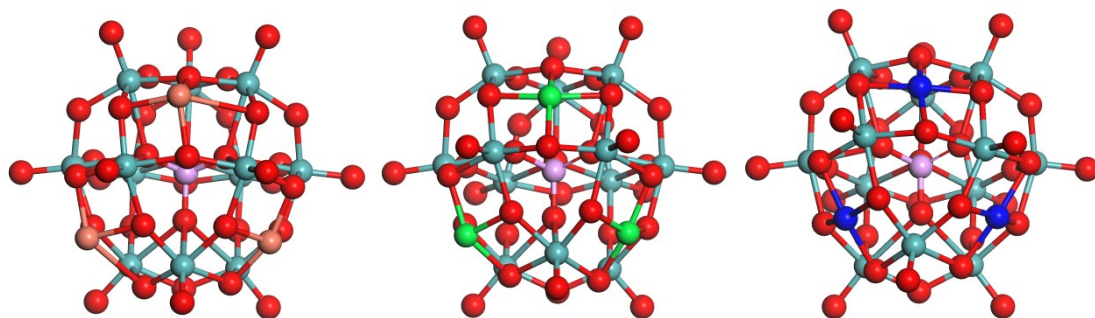

**Figure S1** Optimized configurations of M-PMA (M= Cu, Ru and Pt) with the numbers of M equal to 1, 2 and 3 at the 4-H site of PMA.

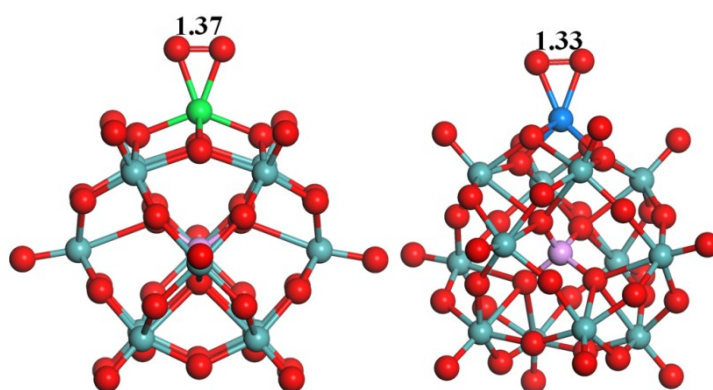

**Figure S2** Optimized configurations of an O<sub>2</sub> molecule adsorbed on M-PMA (M= Ru and Fe).

**Table S1** Calculated adsorption energies ( $E_{\text{ads}}/\text{eV}$ ) for M (M= Cu, Ru and Pt) on PMA with M initially positioned at 4-H, 3H-O<sub>c</sub>, 3H-O<sub>bri</sub>, and B-O<sub>c</sub>-O<sub>bri</sub>, respectively.

| $M_1$ | Initial position                   | $E_{\text{ads}}(\text{eV})$ after optimization |
|-------|------------------------------------|------------------------------------------------|
| Cu    | 4-H                                | -7.50                                          |
|       | 3H-O <sub>c</sub>                  | -7.50                                          |
|       | 3H-O <sub>bri</sub>                | -5.02                                          |
|       | B-O <sub>c</sub> -O <sub>bri</sub> | -4.49                                          |
| Ru    | 4-H                                | -11.04                                         |
|       | 3H-O <sub>c</sub>                  | -11.10                                         |
|       | 3H-O <sub>bri</sub>                | -9.70                                          |
|       | B-O <sub>c</sub> -O <sub>bri</sub> | -9.66                                          |
| Pt    | 4-H                                | -7.92                                          |
|       | 3H-O <sub>c</sub>                  | -5.95                                          |
|       | 3H-O <sub>bri</sub>                | -5.95                                          |
|       | B-O <sub>c</sub> -O <sub>bri</sub> | -5.21                                          |

**Table S2** Calculated adsorption energies (eV) of M (Pt, Ru and Cu) on PMA at the 4-H site with the numbers of M equal to 1, 2 and 3.

| M-PMA | Numbers of M | $E_{\text{ads}}$ |
|-------|--------------|------------------|
| Pt    | 1            | -7.92            |
|       | 2            | -6.14            |
|       | 3            | -5.23            |
| Ru    | 1            | -11.69           |
|       | 2            | -9.49            |
|       | 3            | -8.56            |
| Cu    | 1            | -7.23            |
|       | 2            | -5.11            |
|       | 3            | -4.36            |

**Table S3** The comparison between  $E_{\text{ad}}$  values (eV) and the experimental metal cohesive energies ( $E_{\text{coh}}$ )

| M          | $E_{\text{ads}}$ | $E_{\text{coh}}$ |
|------------|------------------|------------------|
| Group VIII |                  |                  |
| Fe         | -10.90           | -4.28            |
| Ru         | -11.04           | -6.74            |
| Os         | -11.24           | -8.17            |
| Group IX   |                  |                  |
| Co         | -10.41           | -4.39            |
| Rh         | -9.11            | -5.74            |
| Ir         | -10.08           | -6.94            |
| Group X    |                  |                  |
| Ni         | -9.35            | -4.44            |
| Pd         | -6.44            | -3.90            |
| Pt         | -7.92            | -5.85            |
| Group XI   |                  |                  |
| Cu         | -7.50            | -3.48            |
| Ag         | -4.63            | -2.94            |
| Au         | -5.04            | -3.81            |
